# Supplementary material for: Caesarean section delivery and childhood obesity in a British longitudinal cohort study
Source: PLOS journal article supplement (doi:10.1371/journal.pone.0223856), 2019-10-30
Supplement: S1 (10.1371/journal.pone.0223856.s001) [file journal.pone.0223856.s001.pdf]

**UCC Library and UCC researchers have made this item openly available.  
Please [let us know](#) how this has helped you. Thanks!**

|                                    |                                                                                                                                                                                                                                                                                                                                                                            |
|------------------------------------|----------------------------------------------------------------------------------------------------------------------------------------------------------------------------------------------------------------------------------------------------------------------------------------------------------------------------------------------------------------------------|
| <b>Title</b>                       | Caesarean section delivery and childhood obesity in a British longitudinal cohort study                                                                                                                                                                                                                                                                                    |
| <b>Author(s)</b>                   | Masukume, Gwinyai; Khashan, Ali S.; Morton, Susan M. B.; Baker, Philip N.; Kenny, Louise C.; McCarthy, Fergus P.                                                                                                                                                                                                                                                           |
| <b>Publication date</b>            | 2019-10-30                                                                                                                                                                                                                                                                                                                                                                 |
| <b>Original citation</b>           | Masukume, G., Khashan, A. S., Morton, S. M. B., Baker, P. N., Kenny, L. C. and McCarthy, F. P. (2019) 'Caesarean section delivery and childhood obesity in a British longitudinal cohort study', PLOS ONE, 14(10), e0223856. (13pp.) doi: 10.1371/journal.pone.0223856                                                                                                     |
| <b>Type of publication</b>         | Article (peer-reviewed)                                                                                                                                                                                                                                                                                                                                                    |
| <b>Link to publisher's version</b> | <a href="http://dx.doi.org/10.1371/journal.pone.0223856">http://dx.doi.org/10.1371/journal.pone.0223856</a><br>Access to the full text of the published version may require a subscription.                                                                                                                                                                                |
| <b>Rights</b>                      | ©2019 Masukume et al. This is an open access article distributed under the terms of the Creative Commons Attribution License, which permits unrestricted use, distribution, and reproduction in any medium, provided the original author and source are credited.<br><a href="http://creativecommons.org/licenses/by/4.0/">http://creativecommons.org/licenses/by/4.0/</a> |
| <b>Item downloaded from</b>        | <a href="http://hdl.handle.net/10468/9315">http://hdl.handle.net/10468/9315</a>                                                                                                                                                                                                                                                                                            |

Downloaded on 2021-09-18T10:29:04Z

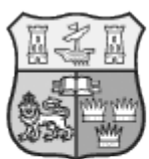

**UCC**

University College Cork, Ireland  
Coláiste na hOllscoile Corcaigh

**S1 Table. International Obesity Task Force classification of body mass index from age three to fourteen and body fat% at age seven and fourteen.**

| Characteristic                                   | Overall n (%)    | Normal vaginal delivery n (%) | Assisted vaginal delivery <sup>a</sup> n (%) | Planned Caesarean section n (%) | Emergency Caesarean section n (%) |
|--------------------------------------------------|------------------|-------------------------------|----------------------------------------------|---------------------------------|-----------------------------------|
| Body mass index (kg/m <sup>2</sup> ) at 3 years* |                  |                               |                                              |                                 |                                   |
| Thin                                             | 178 (1.0)        | 110 (0.9)                     | 17 (1.0)                                     | 19 (1.1)                        | 32 (1.5)                          |
| Normal                                           | 11953 (66.0)     | 8,303 (66.1)                  | 1114 (66.4)                                  | 1111 (66.6)                     | 1,425 (64.7)                      |
| Overweight                                       | 947 (5.2)        | 622 (4.9)                     | 100 (6.0)                                    | 98 (5.9)                        | 127 (5.8)                         |
| Obese                                            | 330 (1.8)        | 217 (1.7)                     | 28 (1.7)                                     | 35 (2.1)                        | 50 (2.3)                          |
| Missing                                          | 4708 (26.0)      | 3315 (26.4)                   | 418 (24.9)                                   | 406 (24.3)                      | 569 (25.8)                        |
| Body mass index (kg/m <sup>2</sup> ) at 3 years  |                  |                               |                                              |                                 |                                   |
| Thin                                             | 706 (3.9)        | 483 (3.8)                     | 50 (3.0)                                     | 67 (4.0)                        | 106 (4.8)                         |
| Normal                                           | 9568 (52.8)      | 6,675 (53.1)                  | 890 (53.1)                                   | 890 (53.3)                      | 1,113 (50.5)                      |
| Overweight                                       | 2376 (13.1)      | 1,590 (12.7)                  | 245 (14.6)                                   | 226 (13.5)                      | 315 (14.3)                        |
| Obese                                            | 758 (4.2)        | 498 (4.0)                     | 73 (4.4)                                     | 84 (5.0)                        | 103 (4.7)                         |
| Missing                                          | 5,414 (29.9)     | 3,804 (30.3)                  | 469 (28.0)                                   | 469 (28.1)                      | 672 (30.5)                        |
| Body mass index (kg/m <sup>2</sup> ) at 5 years  |                  |                               |                                              |                                 |                                   |
| Thin                                             | 699 (3.9)        | 476 (3.8)                     | 66 (3.9)                                     | 60 (3.6)                        | 97 (4.4)                          |
| Normal                                           | 10313 (56.9)     | 7,224 (57.5)                  | 973 (58.0)                                   | 921 (55.2)                      | 1,195 (54.2)                      |
| Overweight                                       | 2266 (12.5)      | 1,500 (11.9)                  | 228 (13.6)                                   | 248 (14.9)                      | 290 (13.2)                        |
| Obese                                            | 834 (4.6)        | 557 (4.4)                     | 77 (4.6)                                     | 84 (5.0)                        | 116 (5.3)                         |
| Missing                                          | 3,286 (26.0)     | 399 (26.1)                    | 416 (23.8)                                   | 602 (24.9)                      | 3,286 (27.3)                      |
| Body mass index (kg/m <sup>2</sup> ) at 7 years  |                  |                               |                                              |                                 |                                   |
| Thin                                             | 750 (4.1)        | 526 (4.2)                     | 63 (3.8)                                     | 60 (3.6)                        | 101 (4.6)                         |
| Normal                                           | 9282 (51.2)      | 6,475 (51.5)                  | 900 (53.7)                                   | 824 (49.4)                      | 1,083 (49.2)                      |
| Overweight                                       | 1966 (10.9)      | 1,321 (10.5)                  | 174 (10.4)                                   | 217 (13.0)                      | 254 (11.5)                        |
| Obese                                            | 873 (4.8)        | 575 (4.6)                     | 77 (4.6)                                     | 97 (5.8)                        | 124 (5.6)                         |
| Missing                                          | 5,995 (33.1)     | 4,196 (33.4)                  | 526 (31.4)                                   | 531 (31.8)                      | 742 (33.7)                        |
| Body mass index (kg/m <sup>2</sup> ) at 11 years |                  |                               |                                              |                                 |                                   |
| Thin                                             | 722 (4.0)        | 492 (3.9)                     | 72 (4.3)                                     | 69 (4.1)                        | 89 (4.0)                          |
| Normal                                           | 7946 (43.9)      | 5,546 (44.1)                  | 789 (47.0)                                   | 671 (40.2)                      | 940 (42.7)                        |
| Overweight                                       | 2607 (14.4)      | 1,767 (14.1)                  | 220 (13.1)                                   | 268 (16.1)                      | 352 (16.0)                        |
| Obese                                            | 870 (4.8)        | 596 (4.7)                     | 64 (3.8)                                     | 99 (5.9)                        | 111 (5.0)                         |
| Missing                                          | 6,693 (36.9)     | 4,658 (37.1)                  | 604 (36.0)                                   | 631 (37.8)                      | 800 (36.3)                        |
| Body mass index (kg/m <sup>2</sup> ) at 14 years |                  |                               |                                              |                                 |                                   |
| Thin                                             | 645 (3.6)        | 463 (3.7)                     | 61 (3.6)                                     | 55 (3.3)                        | 66 (3.0)                          |
| Normal                                           | 6815 (37.6)      | 4,728 (37.6)                  | 672 (40.1)                                   | 602 (36.1)                      | 813 (36.9)                        |
| Overweight                                       | 2475 (13.7)      | 1,411 (11.2)                  | 165 (9.8)                                    | 602 (36.1)                      | 297 (13.5)                        |
| Obese                                            | 797 (4.4)        | 545 (4.3)                     | 59 (3.5)                                     | 81 (4.9)                        | 112 (5.1)                         |
| Missing                                          | 8,029 (44.3)     | 5,883 (46.8)                  | 781 (46.6)                                   | 384 (23.0)                      | 981 (44.5)                        |
| Body fat (%), median IQR at age 7                | 20.1 (17.5-23.8) | 20.1 (17.5-23.7)              | 20 (17.4-23.4)                               | 20.6 (17.8-24.2)                | 20.3 (17.5-24.2)                  |
| Missing                                          | 5435 (30.0)      | 3801 (30.2)                   | 486 (29.0)                                   | 488 (29.2)                      | 660 (30.0)                        |
| Body fat (%), median IQR at age 14               | 21.7 (14.4-28.4) | 22 (14.4-28.4)                | 20 (13.8-26.8)                               | 22.6 (15.3-29.5)                | 21.1 (14.4-28.8)                  |
| Missing                                          | 7898 (43.6)      | 5,510 (43.8)                  | 733 (43.7)                                   | 722 (43.3)                      | 933 (42.4)                        |

\*World Health Organization z-scores
